# Supplementary material for: Annual rhythms of temporal niche partitioning in the Sparidae family are correlated to different environmental variables
Source: PubMed Central journal article supplement (PMC6368640; doi:10.1038/s41598-018-37954-0), 2019-02-08

**Annual rhythms of temporal niche partitioning in the Sparidae family are correlated to different environmental variables**

Valerio Sbragaglia<sup>1,2,\*</sup>, Jesús D. Nuñez<sup>3</sup>, Davide Dominoni<sup>4,5</sup>, Salvatore Coco<sup>6</sup>, Emanuela Fanelli<sup>7</sup>, Ernesto Azzurro<sup>1, 8</sup>, Simone Marini<sup>9</sup>, Marc Nogueras<sup>10</sup>, Massimo Ponti<sup>6,11</sup>, Joaquin del Rio Fernandez<sup>10</sup>, Jacopo Aguzzi<sup>12</sup>

<sup>1</sup> Institute for Environmental Protection and Research (ISPRA), Via del Cedro 38, 57122 Livorno, Italy

<sup>2</sup> Department of Biology and Ecology of Fishes, Leibniz-Institute of Freshwater Ecology and Inland Fisheries, Müggelseedamm 310, Berlin (Germany)

<sup>3</sup> IIMyC, Instituto de Investigaciones Marinas y Costeras, CONICET – FCEyN, Universidad Nacional de Mar del Plata, Funes 3250(7600) Mar del Plata, Provincia de Buenos Aires, Argentina.

<sup>4</sup> Department of Animal Ecology, Netherlands Institute of Ecology (NIOO-KNAW), P.O Box 50, 6700 AB Wageningen, The Netherlands

<sup>5</sup> Institute of Biodiversity, Animal Health and Comparative Medicine, University of Glasgow, Glasgow G128QQ, UK

<sup>6</sup> Dipartimento di Scienze Biologiche, Geologiche e Ambientali, University of Bologna, Via S. Alberto 163, 48123 Ravenna (Italy)

<sup>7</sup> Department of Life and Environmental Sciences, Polytechnic University of Marche, Via Breccie Bianche 60131 Ancona (Italy)

<sup>8</sup> Stazione Zoologica A Dohrn, Villa comunale, Napoli, Italy

<sup>9</sup> Institute of Marine Science, National Research Council of Italy, Forte Santa Teresa, la Spezia.

<sup>10</sup> SARTI Research Group. Dept. Eng. Electrònica. Universitat Politècnica de Catalunya, Vilanova i la Geltrú (Spain)

<sup>11</sup> Consorzio Nazionale Interuniversitario per le Scienze del Mare (CoNISMa), Piazzale Flaminio 9, 00196 Roma, Italy.

<sup>12</sup> Marine Science Institute (ICM-CSIC), Passeig Marítim de la Barceloneta 37-49, Barcelona (Spain)

\* Corresponding author: [valeriosbra@gmail.com](mailto:valeriosbra@gmail.com)

**SUPPLEMENTARY MATERIAL**

**Table S1.** Results of the different family distribution tested with the null model for each of the six species. Among the fitting indicators Akaike's Information Criterion (AIC) is in bold because it is the indicator used to select the best family distribution that in all the cases was the (Negative Binomial type I) NBI as indicated by the lower levels of AIC. The other abbreviations stay for: Zero-Inflated Poisson family distribution (ZIP), Poisson family distribution (PO) and Schwarz Bayesian criterion (SBC).

| Species             | Fitting indicator | Family distribution |          |          |
|---------------------|-------------------|---------------------|----------|----------|
|                     |                   | NBI                 | ZIP      | PO       |
| <i>D. dentex</i>    | Global deviance   | 1782.544            | 2069.538 | 2652.031 |
|                     | <b>AIC</b>        | <b>1786.544</b>     | 2073.538 | 2654.031 |
|                     | SBC               | 1795.051            | 2082.046 | 2658.285 |
| <i>D. sargus</i>    | Global deviance   | 3529.846            | 13322.19 | 15480.94 |
|                     | <b>AIC</b>        | <b>3533.846</b>     | 13326.19 | 15482.94 |
|                     | SBC               | 3542.354            | 13334.7  | 15487.19 |
| <i>D. cervinus</i>  | Global deviance   | 1310.816            | 1727.001 | 2830.907 |
|                     | <b>AIC</b>        | <b>1314.816</b>     | 1731.001 | 2832.907 |
|                     | SBC               | 1323.324            | 1739.509 | 2837.161 |
| <i>D. annularis</i> | Global deviance   | 1825.257            | 16959.41 | 32370.04 |
|                     | <b>AIC</b>        | <b>1829.257</b>     | 16963.41 | 32372.04 |
|                     | SBC               | 1837.765            | 16971.91 | 32376.3  |
| <i>D. vulgaris</i>  | Global deviance   | 5145.064            | 125506.3 | 135874.5 |
|                     | <b>AIC</b>        | <b>5149.064</b>     | 125510.3 | 135876.5 |
|                     | SBC               | 5157.571            | 125518.9 | 135880.7 |
| <i>D. puntazzo</i>  | Global deviance   | 1422.865            | 1518.226 | 1748.583 |
|                     | <b>AIC</b>        | <b>1426.865</b>     | 1522.226 | 1750.583 |
|                     | SBC               | 1435.373            | 1530.733 | 1754.837 |

**Table S2.** Results of the different temporal autocorrelation structure for each of the six species. Among the fitting indicators Akaike's Information Criterion (AIC) is in bold because it is the indicator used to select the best temporal autocorrelation structure. SBC stands for Schwarz Bayesian criterion, the first number in brackets corresponds to p (autoregressive order) and the second to q (the moving average order) value specifying the ARMA structure.

| Species             | Fitting indicator | Autocorrelation structure |         |         |         |
|---------------------|-------------------|---------------------------|---------|---------|---------|
|                     |                   | (3,3)                     | (0,3)   | (0,1)   | (0,2)   |
| <i>D. dentex</i>    | Global deviance   | 1706.08                   | 1717.0  | 1720.41 | 1753.18 |
|                     | <b>AIC</b>        | <b>1722.1</b>             | 1727.0  | 1728.4  | 1759.2  |
|                     | SBC               | 1756.11                   | 1748.27 | 1745.43 | 1771.94 |
|                     |                   | <b>(0,2)</b>              | (0,3)   | (1,0)   | (0,1)   |
| <i>D. sargus</i>    | Global deviance   | 3486.84                   | 3487.02 | 3492.58 | 3494.79 |
|                     | <b>AIC</b>        | <b>3494.84</b>            | 3497.02 | 3498.58 | 3500.79 |
|                     | SBC               | 3511.86                   | 3518.29 | 3511.34 | 3513.55 |
|                     |                   | <b>(0,2)</b>              | (1,2)   | (0,3)   | (1,3)   |
| <i>D. vulgaris</i>  | Global deviance   | 5088.21                   | 5087.29 | 5087.58 | 5087.2  |
|                     | <b>AIC</b>        | 5096.21                   | 5097.29 | 5097.58 | 5099.2  |
|                     | SBC               | 5113.23                   | 5118.56 | 5118.85 | 5124.72 |
|                     |                   | <b>(3,2)</b>              | (3,1)   | (2,3)   | (2,1)   |
| <i>D. annularis</i> | Global deviance   | 1745.15                   | 1747.62 | 1757.23 | 1766.98 |
|                     | <b>AIC</b>        | <b>1759.15</b>            | 1759.62 | 1771.23 | 1776.98 |
|                     | SBC               | 1788.92                   | 1785.14 | 1801.01 | 1798.25 |
|                     |                   | <b>(3,2)</b>              | (2,1)   | (2,3)   | (3,3)   |
| <i>D. cervinus</i>  | Global deviance   | 1297.27                   | 1295.57 | 1296.28 | 1296.43 |
|                     | <b>AIC</b>        | <b>1307.27</b>            | 1309.57 | 1310.28 | 1312.43 |
|                     | SBC               | 1328.54                   | 1339.34 | 1340.06 | 1346.46 |
|                     |                   | <b>(2,2)</b>              | (3,2)   | (3,3)   | (1,2)   |
| <i>D. puntazzo</i>  | Global deviance   | 1396.52                   | 1396.23 | 1396.53 | 1402.63 |
|                     | <b>AIC</b>        | <b>1408.52</b>            | 1410.23 | 1412.53 | 1412.63 |
|                     | SBC               | 1434.04                   | 1440.01 | 1446.56 | 1433.9  |

**Table S3.** In this study we only used 78% of the total number of photos that were collected during the three years' study. The number of photos used for each month is indicated in table S1. The main reasons that contributed to the unavailability of the photos are: (i) problems of acquisition (this is a random error that sometimes occurred and the photo is not correctly acquired); (ii) cleaning of the camera's glass (a routine operation that was scheduled at least every month to guarantee sufficient visibility). Any photos taken on the day cleaning operations were performed were eliminated for possible disturbance of fish behavior by the underwater operators; (iii) technical problems of the whole observatory (e.g., during August 2012 the underwater camera did not work properly); (iv) winter storms during which the turbidity of the water was too high to allow fish counts; (v) external factors such as the theft of the connection copper cable which occurred in December 2014. In the table the number of photos used for each month during the three year of study is reported.

| <b>Months</b> | <b>Years</b> |             |             |
|---------------|--------------|-------------|-------------|
|               | <b>2012</b>  | <b>2013</b> | <b>2014</b> |
| January       | 1132         | 960         | 1461        |
| February      | 1231         | 1274        | 1228        |
| March         | 1440         | 1398        | 1386        |
| April         | 1440         | 1358        | 1380        |
| May           | 1438         | 1363        | 1396        |
| June          | 1217         | 1241        | 1365        |
| July          | 484          | 1376        | 1301        |
| August        | 0            | 1430        | 1259        |
| September     | 174          | 1308        | 1166        |
| October       | 844          | 1427        | 1154        |
| November      | 1367         | 1357        | 569         |
| December      | 1215         | 1419        | 362         |

**TableS4.** All the possible model combination used manipulating presence (+) and absence (-) of independent variables.

|             | 1 | 2 | 3 | 4 | 5 | 6 | 7 | 8 |
|-------------|---|---|---|---|---|---|---|---|
| Temperature | + | - | + | + | + | - | - | - |
| Photoperiod | + | + | - | + | - | + | - | - |
| Salinity    | + | + | + | - | - | - | + | - |

**Fig. S1.** The frequency distribution of the daily count data of each of the 6 species

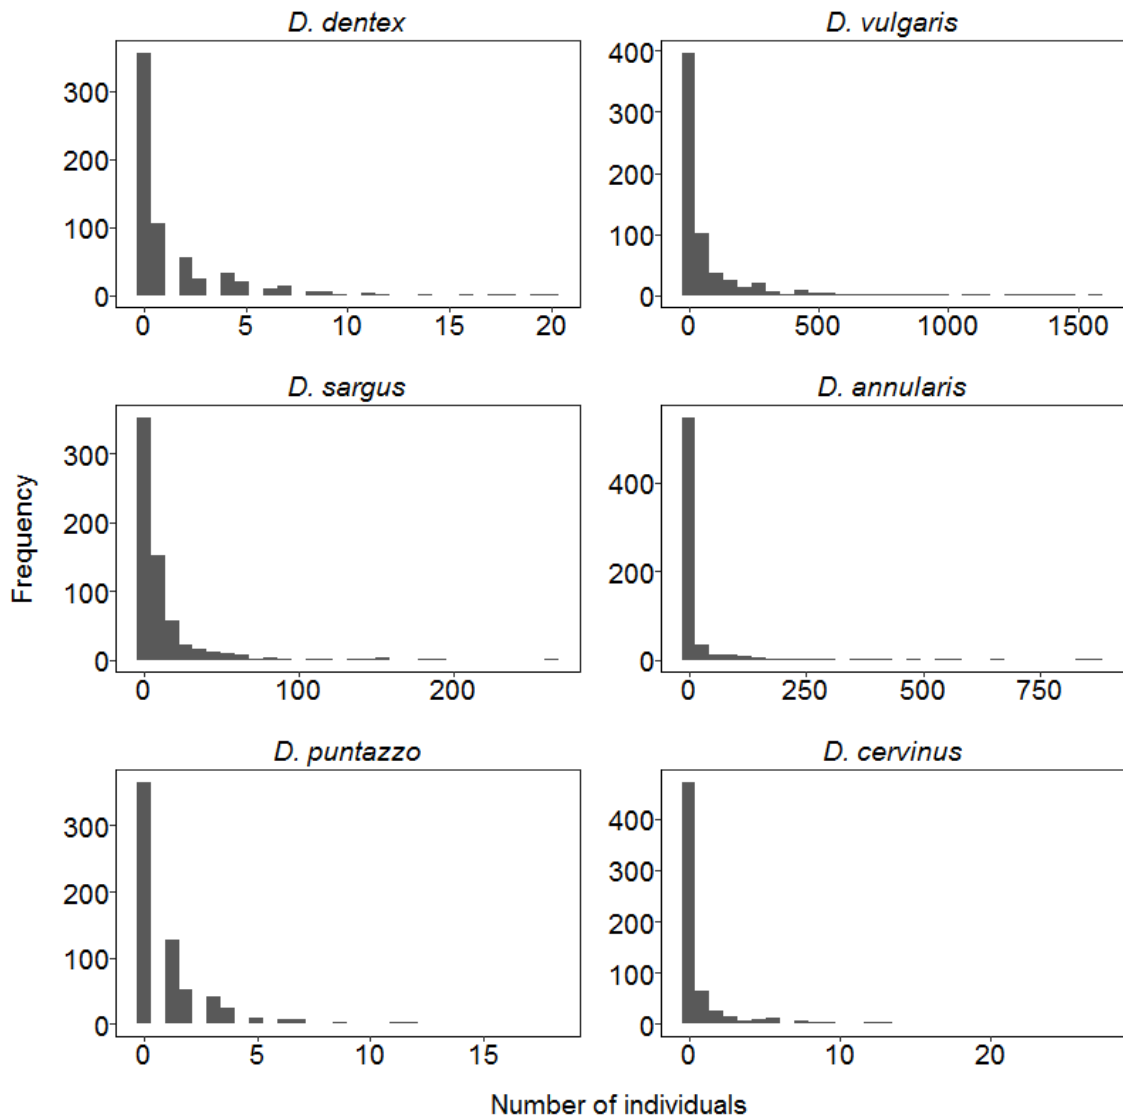

**Fig S2.** A representative (*D. dentex*) example of autocorrelation function plots (ACF) used to estimate the presence of autocorrelation in the residuals. The two plots represent a model without autocorrelation residual structure (a) and the best model selected (b; see also Table S2) with autocorrelation residual structure (e.g. *D. dentex*, GARMA (3,3)). ci: confidence intervals of 95%.

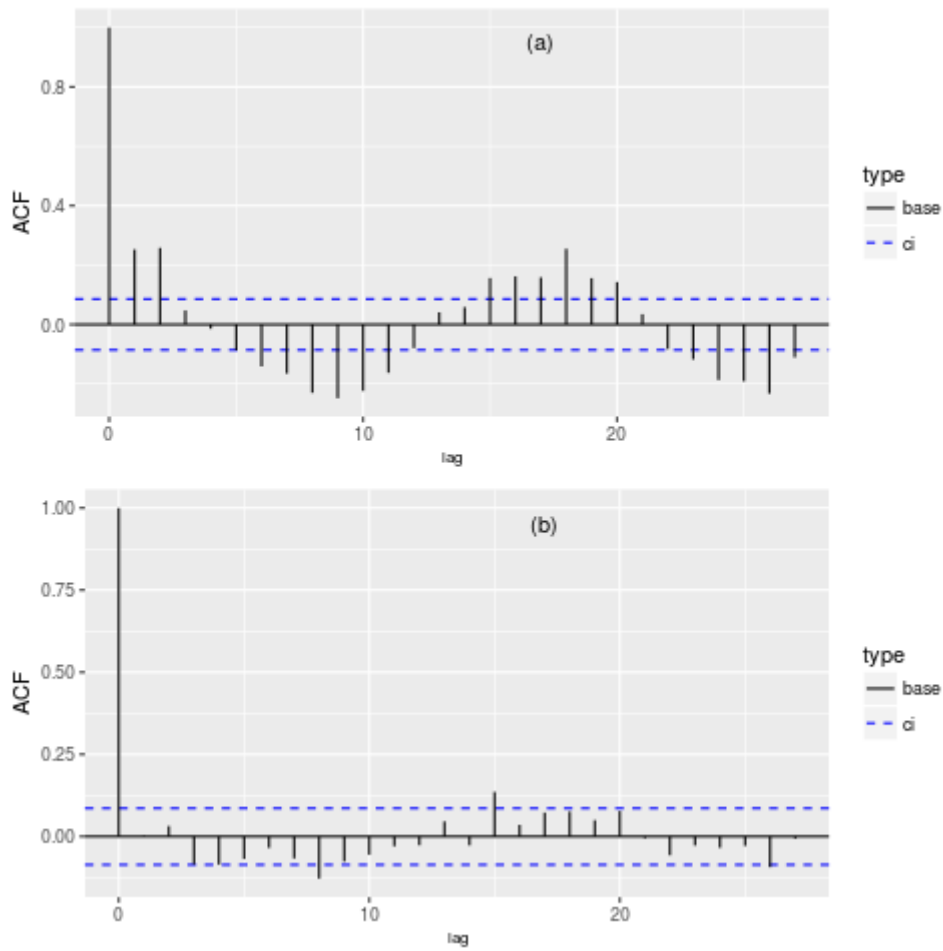



**Fig S3.** Boxplot of the daily number of individuals counted at the artificial reef according to the month (1-12) of the year for the six species studied here. The points represent the daily presence (number of individuals counted) of the species at the artificial reef during the 12 months of the three different years. In red the species that indicated a significant effect of the months as smoothing parameters (see also Table 1).

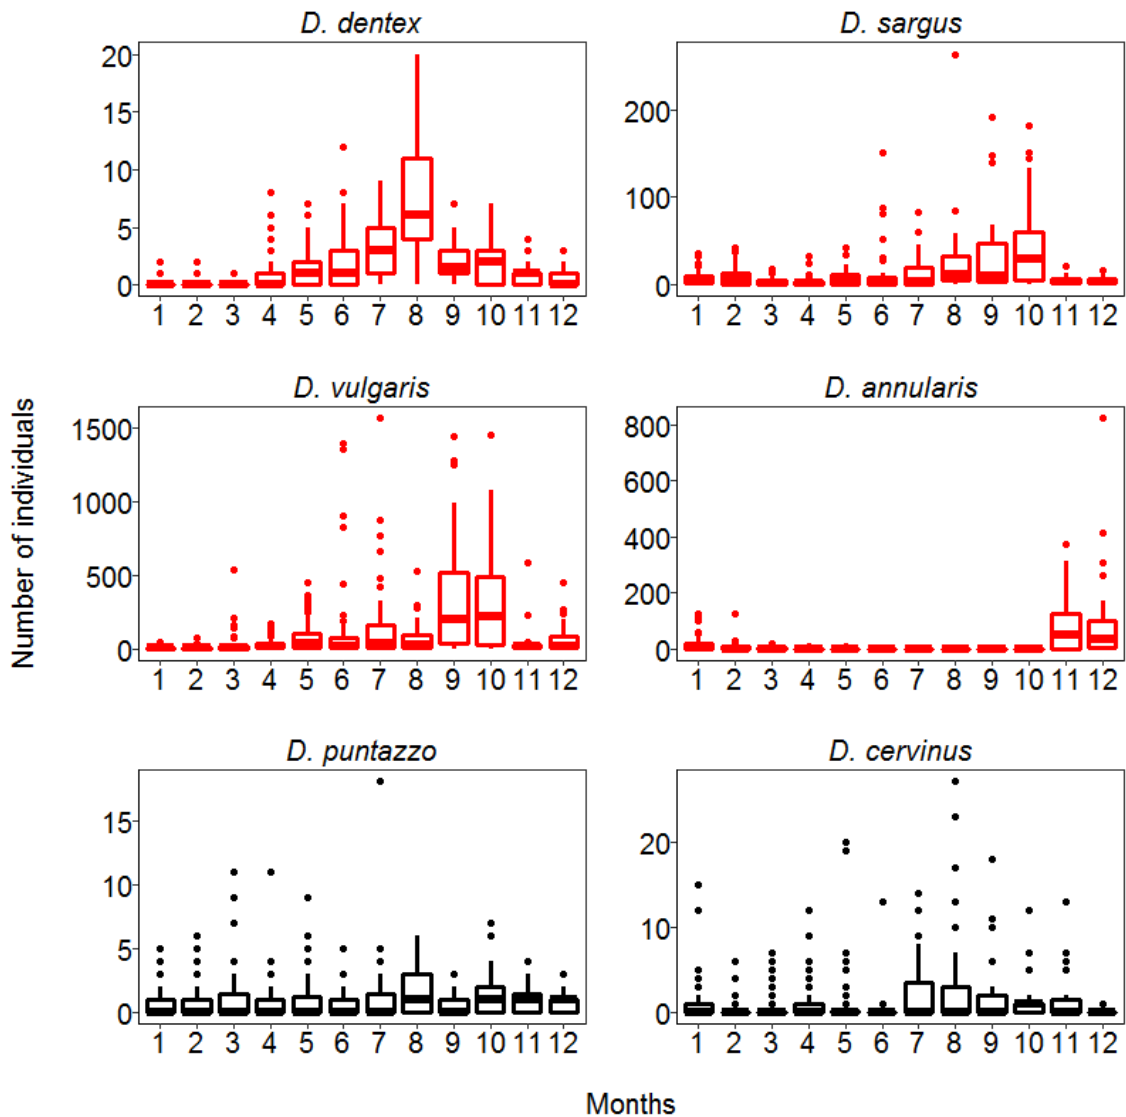

Supplement: 41598_2018_37954_MOESM1_ESM.pdf [file 41598_2018_37954_MOESM1_ESM.pdf]
